# Supplementary material
Source: PubMed Central journal article supplement (PMC2847466)
Supplement: supp_137.8.1305_DEV044255tableS2.pdf [file supp_137.8.1305_DEV044255tableS2.pdf]

**Table S2. *hsp16.2::gfp* transgene expression with different 3'UTRs**

| Gene          | Source of 3'UTR          |                         | Transgenic mRNA localization |                        |
|---------------|--------------------------|-------------------------|------------------------------|------------------------|
|               | Transcribed in the gonad | Translated in the gonad | P granules (t=10-15 minutes) | Core (t=30-45 minutes) |
| <i>tbb-2</i>  | yes                      | yes                     | +                            | +                      |
| <i>pie-1</i>  | yes                      | yes                     | +                            | +                      |
| <i>pos-1</i>  | yes                      | no                      | +                            | +                      |
| <i>unc-54</i> | no                       | no                      | +                            | +                      |

+, positive for mRNA signal; -, no mRNA signal detected above background. *n*=10 gonads examined.
